# Supplementary material for: Mantle cell lymphoma in the era of precision medicine-diagnosis, biomarkers and therapeutic agents
Source: PubMed Central journal article supplement (PMC5217048; doi:10.18632/oncotarget.8961), 2016-04-23
Supplement: oncotarget-07-48692-s001.pdf [file oncotarget-07-48692-s001.pdf]

|                                                 |           |                |                                                                                  |                                      |                                                                                                                                                                                     |                                                                                                           |                                                      |                |
|-------------------------------------------------|-----------|----------------|----------------------------------------------------------------------------------|--------------------------------------|-------------------------------------------------------------------------------------------------------------------------------------------------------------------------------------|-----------------------------------------------------------------------------------------------------------|------------------------------------------------------|----------------|
| <b>RNA/DNA Repair Regulator related markers</b> | MUM1/IRF4 | Gene           | Involved in DNA damage response, facilitates damage-induced chromatin changes    | Up-Regulated                         | Involved in the DNA damage response pathway by contributing to the maintenance of chromatin architecture. Required for efficient DNA repair and cell survival following DNA damage. | Needs further research                                                                                    | IHC, PCR, whole-genome and/or whole-exome sequencing | 216, 231       |
|                                                 | WHSC1     | Gene           | DNA and Chromatin Binding                                                        | Up-Regulated                         | Lysine degradation                                                                                                                                                                  | Needs further research                                                                                    | IHC, PCR, whole-genome and/or whole-exome sequencing | 216, 233       |
|                                                 | MLL2      | Gene           | Provides instructions for making lysine-specific methyltransferase 2D            | Down-Regulated                       | Lysine degradation                                                                                                                                                                  | Needs further research                                                                                    | IHC, PCR, whole-genome and/or whole-exome sequencing | 216, 233       |
|                                                 | MEF2B     | Binding Factor | Interacts with Myo D family of transcriptional activators                        | Mutated                              | Immune response especially with T lymphocytes                                                                                                                                       | Needs further research                                                                                    | IHC, PCR, whole-genome and/or whole-exome sequencing | 216, 233       |
| <b>Clusters of Differentiation</b>              | CD56      | Protein        | Involved in neuron-neuron adhesion, outgrowth of neurites, neurite fasciculation | Usually negative but can be positive | Interferon, NCAM signaling for neurite outgrowth, Cardiac Progenitor Differentiation                                                                                                | Ac2-26 inhibits CD56 function<br>Heparin Sodium Salt inhibits CD56 function<br>RGDS peptide inhibits CD56 | IHC, PCR, Flow Cytometry                             | 216, 243       |
|                                                 | CD200     | Gene           | Stimulates T-Cell proliferation                                                  | Negative                             | Class I MHC mediated antigen processing and presentation, Immuno-regulatory interactions between a Lymphoid and a non-Lymphoid cell                                                 | Not available                                                                                             | IHC, PCR, Flow Cytometry                             | 216, 244       |
|                                                 | CD5       | Protein        | Cell differentiation antigen expressed on thymocytes, T-cells, and B-cells.      | Positive but can be negative         | B Cell Receptor Signaling Pathway, Hematopoietic cell lineage                                                                                                                       | Not available                                                                                             | IHC, PCR, Flow Cytometry                             | 7, 216         |
|                                                 | CD43      | Protein        | Major glycoprotein of thymocytes and T-cells                                     | Positive                             | Cell surface interactions at the vascular wall                                                                                                                                      | Not available                                                                                             | IHC, PCR, Flow Cytometry                             | 14, 15, 216    |
|                                                 | CD23      | Protein        | Receptor for immunoglobulin E, essential for differentiation of B-cells          | Usually negative but can be positive | Signaling by NOTCH2, GPCR, and IL4-mediated signaling events                                                                                                                        | Not available                                                                                             | IHC, PCR, Flow Cytometry                             | 7, 14, 15, 216 |
|                                                 | CD10      | Protein        | Cell membrane metalloproteinase widely distributed in                            | Positive                             | CD10 associates with p85, a PI3K subunit, and Lyn                                                                                                                                   | Not available                                                                                             | IHC, PCR, Flow Cytometry                             | 7, 14, 15, 216 |

|                                               |                           |         |                                                                                                                                                            |                                                                                                                      |                                                                                                                                    |                                                                                                                            |                                                                          |                  |
|-----------------------------------------------|---------------------------|---------|------------------------------------------------------------------------------------------------------------------------------------------------------------|----------------------------------------------------------------------------------------------------------------------|------------------------------------------------------------------------------------------------------------------------------------|----------------------------------------------------------------------------------------------------------------------------|--------------------------------------------------------------------------|------------------|
|                                               |                           |         | hematopoietic cells and their neoplasms                                                                                                                    |                                                                                                                      | kinase indirectly prevents FAK activation by PI3K. Stimulates tumor suppressor PTEN leading to inhibition of Akt signaling pathway |                                                                                                                            |                                                                          |                  |
|                                               | CD103                     | Protein | Mediates adhesion of intra-epithelial T-lymphocytes to epithelial cell monolayers                                                                          | Negative                                                                                                             | ERK, Integrin and Actin Nucleation by ARP-WASP Complex                                                                             | Not available                                                                                                              | IHC, PCR, Flow Cytometry                                                 | 7, 14, 15, 216   |
|                                               | CD20                      | Gene    | Involved in B-cell activation and proliferation                                                                                                            | Positive                                                                                                             | Immune response Fc epsilon RI pathway, PI-3K cascade, Immune response NFAT during immune response                                  | Ibritumomab, Rituximab and Tositumomab inhibit CD20                                                                        | IHC, PCR, Flow Cytometry                                                 | 7, 14, 15, 216   |
|                                               | CD49d                     | Gene    | Makes up half of $\alpha 4\beta 1$ lymphocyte homing receptor                                                                                              | Positive                                                                                                             | ERK Signaling, Actin Nucleation by ARP-WASP Complex                                                                                | natalizumab, a VLA-4 antibody inhibited adhesive interactions between MCL cells and MSCs in in vitro study                 | IHC, PCR, Flow Cytometry                                                 | 216, 245         |
|                                               | CD79a/b                   | Gene    | Required to initiate signal transduction cascade activated by binding of antigen to the B-cell antigen-receptor complex                                    | Positive                                                                                                             | B cell receptor signaling pathway,, Class I MHC mediated antigen processing and presentation, GPCR Pathway                         | Not available                                                                                                              | IHC, PCR, Flow Cytometry                                                 | 212, 216, 246    |
| Immune/Inflammatory Signaling related markers | TLR (Toll like receptors) | Protein | Mediates and instigates altered immune response mainly implicated in malignant transformation, tumor progression and immune evasion in B cell malignancies | TLR1, TLR4, TLR7, TLR9 and TLR10-mRNA levels upregulated while TLR2, TLR3, TLR5 and TLR8 are found to be mutated/low | Toll-like receptor signaling via NF-Kappa B Pathway                                                                                | Needs further research                                                                                                     | IHC, PCR, ELISA, Quantibody Array, whole genome or whole exom sequencing | 216, 247         |
|                                               | IL-12                     | Gene    | Growth factor for T and NK cells, stimulates IFNGamma and IL10 production                                                                                  | Up-regulated                                                                                                         | PEDF Induced Signaling, TGF-Beta, Toll-like receptor and Akt Signaling                                                             | IL-12 at 300 ng/kg starting at day 2 with Rituximab led to complete remission in 50% MCL cases                             | PCR, PCR, ELISA, Quantibody Array                                        | 69, 216          |
|                                               | IL-6                      | Protein | Pro-inflammatory cytokine, anti-inflammatory myokine, stimulates immune response                                                                           | Up-Regulated                                                                                                         | PEDF Induced Signaling, Apoptotic, GPCR , TGF-Beta and ERK Signaling                                                               | Tocilizumab/CNTO 328 (anti-IL6R monoclonal antibody) is available but has not been tried against MCL                       | PCR, PCR, ELISA, Quantibody Array                                        | 34, 69, 148, 216 |
|                                               | IL-2R $\alpha$            | Gene    | Constitutes high, medium, and low-affinity IL2A receptors                                                                                                  | Up-Regulated                                                                                                         | Apoptotic, PEDF TGF-Beta and Akt Signaling pathways                                                                                | Treatment with mTORC1 inhibitor everolimus led to decrease in IL-2Ralpha in T cell lymphoma but has not been tested in MCL | PCR, PCR, ELISA, Quantibody Array                                        | 69, 216          |

|                     |                                            |         |                                                                                               |                     |                                                                                                  |                                                                                                                                                                                                         |                                          |                  |
|---------------------|--------------------------------------------|---------|-----------------------------------------------------------------------------------------------|---------------------|--------------------------------------------------------------------------------------------------|---------------------------------------------------------------------------------------------------------------------------------------------------------------------------------------------------------|------------------------------------------|------------------|
|                     | MIG (Monokine induced by Interferon-Gamma) | Protein | Affects growth, movement, and activation state of immune and inflammatory cells               | Up-Regulated        | PEDF, GPCR, ERK and Toll-like receptor signaling pathways                                        | Combination of vorinostat and rituximab led to decrease in MIG levels in indolent NHL                                                                                                                   | PCR, PCR, ELISA, Quantibody Array        | 69, 70, 216      |
|                     | IL-1RA                                     | Protein | Inhibits pro-inflammatory cytokines, modulates interleukin-related immune responses           | Up-Regulated        | Interleukin-1, Interferon and NOD-like Receptor Signaling Pathways                               | Combination of vorinostat and rituximab led to decrease in MIG levels in indolent NHL                                                                                                                   | PCR, PCR, ELISA, Quantibody Array        | 69, 216          |
|                     | IL-8                                       | Protein | Chemotactic factor that attracts immune cells and involved in neutrophil activation           | Up-Regulated        | PEDF, TGF-Beta, Toll-like receptor, Peptide ligand-binding receptors and GPCR signaling pathways | Ibrutinib and Fostamatinib have been shown to decrease IL-8 levels                                                                                                                                      | PCR, PCR, ELISA, Quantibody Array        | 69, 70, 148, 216 |
|                     | IL-10                                      | Protein | Cytokine synthesis inhibitory factor, stimulates proliferation and differentiation of T-cells | Up-Regulated        | PEDF, TGF-Beta, Akt and ERK Signaling                                                            | Ibrutinib and Fostamatinib have been shown to decrease IL-10 levels                                                                                                                                     | PCR, PCR, ELISA, Quantibody Array        | 148, 216         |
|                     | IL-22                                      | Protein | Contributes to in vivo inflammatory response                                                  | Up-Regulated        | PEDF, TGF-Beta, Akt, ERK and PAK signaling pathways                                              | NF- $\kappa$ B inhibitors, 6-amino-4-(phenoxyphenylethylamino)quinazoline (A and C) and E-2-fluoro-4'-methoxystilbene inhibit IL-22 expression in MCL cells                                             | PCR, PCR, ELISA, Quantibody Array        | 216, 248         |
|                     | LYN                                        | Protein | Activates other kinases involved in activation and proliferation of immune cells              | Up-Regulated        | PI-3K cascade, Immune response, B Cell Receptor-antigen signaling pathways                       | Many Lyn peptide inhibitors are available; however, PP2 and dasatinib suppressed BCR-induced LYN and JNK phosphorylation as well as EGR-1 upregulation seen with MCL                                    | PCR, PCR, ELISA, Quantibody Array        | 149, 216         |
|                     | BTK                                        | Gene    | Plays role in B cell maturation and mast cell activation                                      | Up-Regulated        | PEDF, TGF-Beta, Immune response Fc epsilon RI pathway, Akt and ERK signaling pathway             | Ibrutinib has shown promise against all B cell malignancies; other specific BTK inhibitors such as CC292, ACP-196 and ONO 4059 are in the pipeline                                                      | PCR, PCR, ELISA, Quantibody Array        | 125, 146, 216    |
| Signaling molecules | NOTCH1                                     | Gene    | Play role in developmental processes through determining cell fate                            | Mutated             | Pre-NOTCH Expression and Processing, Notch signaling pathway (KEGG)                              | Under clinical investigation                                                                                                                                                                            | IHC, PCR, Whole transcriptome sequencing | 22, 24, 216      |
|                     | Mtorc1/2                                   | Protein | Activates translation of proteins                                                             | Aberrant activation | Insulin receptor signaling cascade, PI-3K cascade, Signaling by FGFR and mTOR Pathways           | Temsirolimus, everolimus and ridaforolimus have been shown to be active against MCL<br>Newer molecules such as NVP-BEZ235, WYE-132, AZD8055, PP242, and OSI-027 have been tested against MCL cell lines | IHC, PCR, WB                             | 156, 216, 249    |
|                     | WNT                                        | Gene    | Modulates cell behavior and fate during development                                           | Mutated             | Wnt signaling and signaling by GPCR                                                              | Needs further research                                                                                                                                                                                  | IHC, PCR, WB                             | 216, 250         |
|                     | AKT                                        | Protein | Plays role in apoptosis, cell proliferation, and                                              | Up-Regulated        | PI-3K cascade, IL-9 and Apoptotic                                                                | Perifosine and MK2206 are under clinical investigation                                                                                                                                                  | IHC, PCR, WB                             | 169, 170, 216    |

|                           |                                                                                     |         |                                                                                     |                      |                                                                                                                                               |                                                                                                                             |                          |                    |
|---------------------------|-------------------------------------------------------------------------------------|---------|-------------------------------------------------------------------------------------|----------------------|-----------------------------------------------------------------------------------------------------------------------------------------------|-----------------------------------------------------------------------------------------------------------------------------|--------------------------|--------------------|
|                           |                                                                                     |         | transcription                                                                       |                      | signaling pathways                                                                                                                            |                                                                                                                             |                          |                    |
|                           | SOCS1 (suppressor of cytokine signaling 1)                                          | Protein | Suppresses cytokine signaling and JAK/STAT pathway                                  | Mutated              | Class I MHC mediated antigen processing and presentation mediated signaling, Interferon, IL-2 and IFN alpha/beta signaling pathways           | Needs further research                                                                                                      | IHC, PCR, WB             | 151, 185, 186, 216 |
|                           | GSK3B                                                                               | Protein | Inactivating agent of glycogen synthase                                             | Up-Regulated         | PI-3K cascade, FGFR, IL-9 and insulin Signaling Pathways. Involved with activation of cAMP-Dependent PKA                                      | Needs further research                                                                                                      | IHC, PCR, WB             | 216, 251           |
|                           | JAK-2                                                                               | Gene    | Encodes for non-receptor tyrosine kinase JAK-2                                      | Aberrantly activated | Signaling by Interleukins, Interferon and CNTF Signaling pathways                                                                             | SB 1518 has been shown to be active against MCL                                                                             | IHC, PCR, WB             | 198, 216           |
| CHEMOKINES                | CXCR4                                                                               | Protein | Receptor for stromal-derived factor 1                                               | Up-Regulated         | Chemokine signaling pathway, GPCR, Akt and EphB-EphrinB signaling pathways                                                                    | antibodies against CXCR4 and Plerixafor, a CXCR4 antagonist are active against MCL                                          | IHC, PCR, Flow cytometry | 32, 216, 245       |
|                           | CXCR5                                                                               | Protein | Receptor for CXCL13                                                                 | Up-Regulated         | Chemokine signaling pathway, GPCR, Akt and PEDF Induced Signaling                                                                             | Needs further research                                                                                                      | IHC, PCR, Flow cytometry | 216, 245           |
| Cell Function/Maintenance | HSP90                                                                               | Protein | Assists other proteins to fold properly and stabilizes proteins against heat stress | Up-Regulated         | Nucleotide-binding domain, leucine rich repeat containing receptor (NLR) signaling pathways, Fc gamma receptor (FCGR) dependent phagocytosis, | IPI-504 in combination with Bortezomib is effective against MCL. Other newer Hsp-90 inhibitors are being tested against MCL | IHC, PCR, FISH           | 174, 216           |
|                           | SLC29A2 [solute carrier family 29 (equilibrative nucleoside transporter), member 2] | Gene    | Transport of organic compounds and nutrients                                        | Up-Regulated         | ATP mediated transport of molecules via electrochemical gradient                                                                              | Decynium 22, Dilazep dihydrochloride and Dipyridamole inhibit SLC29A2 function                                              | IHC, PCR, FISH           | 216, 236           |

Supplementary Table 1: Table describing the key MCL biomarkers that inform diagnosis, prognosis, and functional drug interactions of MCL, along with their normal functions.
