# Supplementary material for: Mantle cell lymphoma in the era of precision medicine-diagnosis, biomarkers and therapeutic agents
Source: PubMed Central journal article supplement (PMC5217048; doi:10.18632/oncotarget.8961), 2016-04-23
Supplement: oncotarget-07-48692-s002.pdf [file oncotarget-07-48692-s002.pdf]

|                                                                        |                                                                                  |                                                                                               |                                                                                                                   |                                                |      |                                        |             |                          |                            |                                          |      |       |
|------------------------------------------------------------------------|----------------------------------------------------------------------------------|-----------------------------------------------------------------------------------------------|-------------------------------------------------------------------------------------------------------------------|------------------------------------------------|------|----------------------------------------|-------------|--------------------------|----------------------------|------------------------------------------|------|-------|
| Rituximab+ Bendamustine+ Ibrutinib                                     | mechlorethamine + monoconal Ab+ BTK Inhibitor                                    | untreated& relapsed/re-refractory NHL                                                         | lymphopenia, neutropenia , thrombocytopenia, and rash                                                             | 48                                             | 1/1b | 52%                                    | N/A         | N/A                      | 72% {MCL ORR 94% (76% CR)} | N/A                                      | 2015 | [96]  |
| Temsirolimus +Bendamustine +Rituximab (BeRT)                           | (mTOR) inhibitor+ Alkylating agent+ monoconal Ab                                 | r/r FL or MCL: Patients with 1-3 prior therapies                                              | fatigue, nausea , mucositis, vomiting, Cough, diarrhea, pyrexia ,rash, leukopenia, neutropenia & thrombocytopenia | 15                                             | 1/2  | 33.33 %                                | N/A         | N/A                      | 93% & for MCL:33%          | 19 months 67%                            | 2015 | [261] |
| R-DexaBEAM followed by HDT                                             | Rituximab: monoclonal anti-CD20 antibody                                         | relapsed or refractory B-cell lymphoma                                                        | all patients undergoing HDT experienced grade 4 haemato-toxicity                                                  | 103                                            | 2    | iNHL :32% aNHL :27%                    | N/A         | N/A                      | aNHL: 62%, iNHL:78%        | aNHL: 0.83Y(44% 7.3Y) iNHL: 3.7Y(72% 8Y) | 2015 | [262] |
| Bendamustine, lenalidomide and Rituximab                               | mechlorethamine+ immunomodulatory agent+ monoconal Ab                            | relapsed and refractory lymphomas                                                             | neutropenia was the most common grade 3 and 4 toxicity                                                            | 20<br>14 evaluable                             | 1    | 25%                                    | 10%         | N/A                      | 35%                        | N/A                                      | 2015 | [263] |
| Temsirolimus and Bortezomib                                            | (mTOR) inhibitor+ proteasome inhibitor                                           | Relapsed or Refractory B-Cell NHL                                                             | no unexpected toxicities from the combination                                                                     | 39                                             | 2    | 7.70%                                  | 23%         | N/A                      | 31%                        | 4.7 months                               | 2015 | [264] |
| Bortezomib and Alvocidib                                               | reversible 26S proteasome inhibitor and flavonoid alkaloid CDK9 kinase inhibitor | multiple myeloma, indolent lymphoma, Waldenstrom macroglobulin emia, and mantle cell lymphoma | leukopenia, lymphopenia, neutropenia, and thrombocytopenia                                                        | 44, assessable :39 (5 patients of MCL)         | 1    | NA                                     | NA          | N/A                      | N/A                        | N/A                                      | 2014 | [138] |
| Bortezomib-BEAM and autologous hematopoietic stem cell transplantation | Bortezomib: proteasome inhibitor                                                 | relapsed/refractory Diffuse and nodular forms of MCL                                          | were manageable with no observed any treatment-related mortalities                                                | 42: 13 patients phase I & 29 patients phase II | I/II | At 1 year after ASCT 84% (P1) /81%(p2) | P1:3% P2:4% | P1:91% at 1Y & 67% at 5Y | P1:87% /P2:89%             | p1:83% /P2:83% (at 1 Y) and P1:32% at 5Y | 2014 | [128] |
| Alisertib                                                              | Selective Aurora A Kinase Inhibitor                                              | Relapsed and Refractory Aggressive B- and T-Cell NHL                                          | grade 3/4 toxicities: neutropenia, leukopenia anemia, thrombocytopenia , stomatitis, febrile neutropenia &        | 48                                             | 2    | 10%                                    | 17%         | N/A                      | 27%                        | 20% for 720 days                         | 2014 | [265] |

|                                     |                                                                                                                                                                                               |                                          |                                                                                                                 |                             |                                 |             |        |                 |     |             |      |       |
|-------------------------------------|-----------------------------------------------------------------------------------------------------------------------------------------------------------------------------------------------|------------------------------------------|-----------------------------------------------------------------------------------------------------------------|-----------------------------|---------------------------------|-------------|--------|-----------------|-----|-------------|------|-------|
|                                     |                                                                                                                                                                                               |                                          | fatigue.                                                                                                        |                             |                                 |             |        |                 |     |             |      |       |
| Obatoclox and bortezomib            | BH3 mimetic inhibitor+ proteasome inhibitor                                                                                                                                                   | relapsed/refractory MCL                  | Grade 3/4 events: thrombocytopenia, anemia and fatigue                                                          | 13                          | I/II                            | 23%         | 8%     | NA              | 31% | N/A         | 2014 | [208] |
| panobinostat + everolimus           | histone deacetylase inhibitor+ mTOR inhibitor                                                                                                                                                 | Relapsed or Refractory Lymphoma          | Grade 3/4 toxicity included thrombocytopenia , neutropenia , anemia , infection , fatigue & dyspnea             | 30, evaluable: 29           | 1                               | 10%         | 23%    | N/A             | 33% | N/A         | 2013 | [197] |
| Lenalidomide + rituximab            | L: immune-modulatory agent, R: anti-CD20 mAb                                                                                                                                                  | relapsed or refractory MCL               | grade 3-4 haematological toxicities                                                                             | 52 (phase1:14, phase1/2:44) | 1/2                             | phase 2:36% | 20%    | 24.3 months     | 57% | 11.1 months | 2012 | [266] |
| Everolimus (RAD001)                 | mTOR inhibitor                                                                                                                                                                                | Relapsed or Refractory MCL               | criteria grade 3 including anemia thrombocytopenia and neutropenia                                              | 36, evaluable 35            | 2                               | 5.70%       | 14.28% | N/A             | 20% | 5.5 months  | 2012 | [267] |
| Bendamustine W/O Rituximab          | Alkylating agent(mechlorethamine) W/O monoclonal Ab                                                                                                                                           | heavily pretreated NHL                   | neutropenia, anemia and thrombocytopenia, were primarily grade 0/1/2 in severity                                | 175                         | multicenter retrospective study | 29%         | 43%    | 10 months (70%) | 71% | N/A         | 2012 | [268] |
| Temsirolimus+rituximab              | (mTOR) inhibitor +an antiCD20 antibody                                                                                                                                                        | relapsed or refractory MCL               | Thrombocytopenia, neutropenia, fatigue, leucopenia, pneumonia, lymphopenia, pneumonitis & hypertriglyceridaemia | 71 enrolled 69 assessable   | 2                               | 19%         | 41%    | N/A             | 59% | N/A         | 2011 | [269] |
| Bendamustine+ Bortezomib+ rituximab | Bendamustine:Alkylating agent, Bortezomib: antineoplastic agent& Rituximab: anti-CD20 antibody                                                                                                | relapsed/refractory indolent and MCL NHL | nausea, neuropathy, fatigue, constipation and fever                                                             | 30 evaluable: 29            | 2                               | 51.70%      | N/A    | N/A             | 83% | N/A         | 2010 | [126] |
| RT-PEPC                             | rituximab: monoclonal anti-CD20 antibody + thalidomide: immune-modulatory agent plus prednisone: antiinflammatory; etoposide+procarbazine (both antineoplastic agents), and cyclophosphamide: | Recurrent MCL                            | grade 1/ 2 fatigue, rash, neuropathy, and cytopenias, thrombocytopenia and grade 3 and 4 neutropenia            | 25 enrolled, 22 evaluable   | 2                               | 32%         | 41%    | N/A             | 73% | 10 months   | 2010 | [270] |

|                                                                     |                                                                     |                                                                                       |                                                                                                              |                           |   |           |           |                  |                 |                     |      |       |
|---------------------------------------------------------------------|---------------------------------------------------------------------|---------------------------------------------------------------------------------------|--------------------------------------------------------------------------------------------------------------|---------------------------|---|-----------|-----------|------------------|-----------------|---------------------|------|-------|
|                                                                     | alkylating agent                                                    |                                                                                       |                                                                                                              |                           |   |           |           |                  |                 |                     |      |       |
| Tipifamib                                                           | Farnesyltransferase                                                 | relapsed/refractory MCL                                                               | no grade III–IV hematological toxicities                                                                     | 11                        | 2 | 9%        | 0%        | N/A              | 9%              | 3 months            | 2010 | [271] |
| Yttrium-90-ibritumomab tiuxetan                                     | Radio-immunotherapy                                                 | relapsed/refractory MCL                                                               | primarily hematologic, Grade 3/4 thrombocytopenia& Grade 3/4 neutropenia                                     | 34                        | 2 | 15.60 %   | 15.60 %   | 21 months        | 31%             | 6 months            | 2009 | [272] |
| Gemcitabine, mitoxantrone, and Rituximab                            | Gemcitabine: Nucleoside Metabolic Inhibitor                         | relapsed or refractory MCL                                                            | grade 3–4 toxicities : neutropenia, leukopenia, thrombocytopenia& anemia                                     | 16                        | 2 | 20%       | 27%       | N/A              | 47%             | N/A                 | 2009 | [273] |
| Bendamustine + Rituximab                                            | Alkylating agent(mechlorethamine) + monoclonal Ab                   | relapsed indolent B-cell and MCL non-Hodgkin's lymphoma                               | well tolerated; the primary toxicity was grade 3/4 neutropenia & grade 3/4 thrombocytopenia                  | 66                        | 2 | 41%       | 38%       | N/A              | 92%             | 23 months           | 2008 | [121] |
| R-HyperCVAD alternating with rituximab plus methotrexate-cytarabine | Chemo-immunotherapy                                                 | relapsed or refractory aggressive MCL                                                 | neutropenic fever , grade 3 or 4 neutropenia, and grade 3 or 4 thrombocytopenia                              | 29                        | 2 | 45%       | 48%       | N/A              | 93%             | N/A                 | 2008 | [274] |
| aza-epothilone Ixabepilone (BMS247550)                              | microtubule stabilization agent                                     | relapsed or refractory indolent NHL & MCL                                             | fatigue, myelosuppression, neuropathy & the most prominent advanced toxicities were leucopenia & lymphopenia | 28<br>22 assessable       | 2 | 4.54%     | 22.70 %   | 8 months: 4.54 % | 27%             | N/A                 | 2008 | [275] |
| Bendamustine+ Mitoxantrone+ Rituximab (BMR)                         | B:Alkylating agent, M: chemotherapy R: monoclonal Ab                | stage III/IV relapsed or refractory indolent lymphomas and mantle cell lymphoma (MCL) | grade 3/4 toxicities                                                                                         | 57                        | 2 | 35%       | 54%       | 2 years          | 89%             | 19 months           | 2007 | [132] |
| Enzastaurin                                                         | protein kinase C beta inhibitor (serine/threonine kinase inhibitor) | relapsed or refractory MCL                                                            | grade 3 anemia, diarrhea, dyspnea, vomiting, hypotension, and syncope                                        | 60                        | 2 | N/A       | N/A       | 22 months        | N/A             | 2 months            | 2007 | [167] |
| Bortezomib                                                          | proteasome inhibitor                                                | relapsed or refractory B-cell non-Hodgkin's                                           | Grade 3/4 toxicities and three deaths.                                                                       | 60 (12of29 assessable MCL | 2 | A1:20 .5% | A2:2 0.5% | N/A              | A1:41 % , A2:19 | 6 months (A1:42 % , | 2005 | [276] |

|  |  |           |  |                                                      |  |  |  |  |  |   |              |  |  |
|--|--|-----------|--|------------------------------------------------------|--|--|--|--|--|---|--------------|--|--|
|  |  | lymphoma. |  | (A1) &<br>4/2 1<br>assessable<br>other BCL<br>(A2) ) |  |  |  |  |  | % | A2:36<br>(%) |  |  |
|--|--|-----------|--|------------------------------------------------------|--|--|--|--|--|---|--------------|--|--|

Supplementary Table 2: Table describing the details of the published clinical trials on the MCL drugs as single or in combination where A: arm , P: phase, Y: year, R-DexaBEAM: rituximab,examethasone, carmustine, etoposide, cytarabine and melphalan; HDT: high-dose therapy; aNHL: aggressive NHL; iNHL: indolent Lymphoma; N/A : Not available.
